# Supplementary material
Source: publisher figshare collection journal article supplement (https://geolsoc.figshare.com/ndownloader/files/13303385)
Supplement: Supplementary file 1 [file 13303385]

## Sheet: Sheet1
Well	Depth below top Cenozoic (m TVD)	Formation	# particles	Phyclasts %	Inertinit %	Vitrinite %	Cutinite %	Sporomo %	Spores %	Pollen %	terrestrial AOM %	marine AOM %	AOM %	Phyto-plankton %	Prasino-phytes %	Acritarcs %	Dinocysts %	Leiospheres %	Freshwater algae %	Foramini-feres %	Fungi %		Kerogen Types Type I Type II Type III Type IV
C	20	UHy	321	30.5296	2.80374	23.676	4.04984	6.54206	2.49221	4.04984	0	42.0561	42.0561	9.65732	1.24611	0	8.41121	0	11.215	0	0		54.5171	14.9533	27.7259	2.80374
C	55	UHy	291	39.8625	3.43643	36.4261	0	10.6529	6.18557	4.46735	0	44.6735	44.6735	4.12371	0.343643	0	3.09278	0.687285	0.687285	0	0		46.3918	13.7457	36.4261	3.43643
C	135	UHy	370	17.027	3.24324	11.6216	2.16216	12.1622	7.83784	4.32432	0	68.9189	68.9189	1.89189	0	0	1.08108	0.810811	0	0	0		69.7297	13.2432	13.7838	3.24324
C	213	UHy	295	13.2203	5.08475	8.13559	0	1.69492	0.677966	1.01695	0	84.7458	84.7458	0.338983	0	0	0	0.338983	0	0	0		85.0847	1.69492	8.13559	5.08475
C	289	UHy	288	21.5278	10.0694	11.4583	0	11.8056	9.375	2.43056	0	63.1944	63.1944	3.47222	0	0	1.73611	1.73611	0	0	0		64.9306	13.5417	11.4583	10.0694
C	370	UHy	266	31.203	3.00752	26.6917	1.50376	9.77444	5.26316	4.51128	0	56.391	56.391	2.25564	0	0	0	2.25564	0.37594	0	0		59.0226	9.77444	28.1955	3.00752
C	450	UHy	337	18.9911	4.74777	13.6499	0.593472	14.5401	8.90208	5.63798	0	62.3145	62.3145	4.1543	0.890208	0	3.26409	0	0	0	0		63.2047	17.8042	14.2433	4.74777
C	508	UHy	261	12.2605	2.29885	9.57854	0.383142	14.9425	6.13027	8.81226	0	59.387	59.387	11.1111	0.383142	0	10.728	0	2.29885	0	0		62.069	25.6705	9.96169	2.29885
C	532	LHy	269	18.2156	8.92193	9.29368	0	12.2677	6.3197	5.94796	0	67.658	67.658	1.85874	0.743494	0	0.743494	0.371747	0	0	0		68.7732	13.0112	9.29368	8.92193
C	570	LHy	266	21.4286	4.13534	16.9173	0.37594	10.9023	1.8797	9.02256	0	62.406	62.406	5.26316	0.37594	0	4.88722	0	0	0	0		62.782	15.7895	17.2932	4.13534
C	600	LHy	286	24.4755	3.14685	20.6294	0.699301	16.4336	3.84615	12.5874	0	45.4545	45.4545	13.6364	1.3986	0	11.5385	0.699301	0	0	0		47.5524	27.972	21.3287	3.14685
C	620	LHy	266	23.3083	1.12782	22.1805	0	14.2857	6.76692	7.5188	0	45.1128	45.1128	17.2932	0.75188	0	16.5414	0	0	0	0		45.8647	30.8271	22.1805	1.12782
C	675	LHy	227	57.7093	9.2511	44.0529	4.40529	8.37004	3.96476	4.40529	11.4537	19.3833	30.837	3.0837	0	0	2.64317	0.440529	0	0	0		19.8238	11.0132	59.9119	9.2511
C	705	LHy	287	29.6167	9.7561	18.4669	1.39373	8.36237	4.52962	3.83275	4.52962	44.2509	48.7805	13.2404	1.74216	0	11.4983	0	0	0	0		45.993	19.8606	24.3902	9.7561
C	740	LHy	367	42.7793	20.7084	20.9809	1.08992	8.99183	2.7248	6.26703	8.17439	29.4278	37.6022	10.6267	1.08992	0	9.53678	0	0	0	0		30.5177	18.5286	30.2452	20.7084
C	770	LHy	301	51.1628	32.8904	18.2724	0	12.6246	4.31894	8.30565	23.2558	12.9568	36.2126	0	0	0	0	0	0	0	0		12.9568	12.6246	41.5282	32.8904
C	800	LHy	323	47.3684	12.0743	34.0557	1.23839	18.5759	5.57276	13.0031	17.3375	13.9319	31.2693	2.78638	0.309598	0	2.47678	0	0	0	0		14.2415	21.0526	52.6316	12.0743
C	810	Cor	278	43.1655	4.67626	36.3309	2.15827	14.7482	5.7554	8.99281	19.7842	21.5827	41.3669	0.719424	0	0	0.719424	0	0	0	0		21.5827	15.4676	58.2734	4.67626
C	825	Cor	215	32.093	9.30233	22.7907	0	19.5349	8.37209	11.1628	12.093	28.8372	40.9302	7.44186	0.930233	0	6.51163	0	0	0	0		29.7674	26.0465	34.8837	9.30233
C	845	Cor	306	59.8039	6.53595	48.6928	4.57516	12.7451	2.94118	9.80392	22.8758	3.26797	26.1438	1.30719	0.980392	0	0.326797	0	0	0	0		4.24837	13.0719	76.1438	6.53595
C	858	Cor	255	47.8431	16.0784	30.1961	1.56863	18.8235	6.27451	12.549	11.3725	18.4314	29.8039	3.52941	0	0	1.96078	1.56863	0	0	0		20	20.7843	43.1373	16.0784
C	880	Cor	328	14.3293	7.0122	7.31707	0	18.5976	9.7561	8.84146	14.3293	41.4634	55.7927	11.2805	0	0	11.2805	0	0	0	0		41.4634	29.878	21.6463	7.0122
C	895	Cor	307	6.51466	2.60586	0	3.90879	18.8925	5.86319	13.0293	14.9837	52.443	67.4267	7.16612	0.325733	0	6.84039	0	0	0	0		52.7687	25.7329	18.8925	2.60586
C	912	Cor	273	12.4542	2.1978	9.52381	0.732601	13.5531	10.989	2.5641	5.86081	55.3114	61.1722	12.8205	1.8315	0	10.6227	0.3663	0	0	0		57.5092	24.1758	16.1172	2.1978
C	930	Cor	294	5.78231	1.36054	3.7415	0.680272	22.1088	10.5442	11.5646	2.72109	55.102	57.8231	14.2857	0.340136	0	13.6054	0.340136	0	0	0		55.7823	35.7143	7.14286	1.36054
C	975	Cer	258	4.65116	2.71318	1.93798	0	22.093	12.0155	10.0775	3.48837	56.9767	60.4651	12.7907	1.93798	0	10.8527	0	0	0	0		58.9147	32.9457	5.42636	2.71318
C	995	Cer	272	12.5	2.94118	9.55882	0	18.75	9.92647	8.82353	0.735294	39.7059	40.4412	28.3088	0.367647	0	27.9412	0	0	0	0		40.0735	46.6912	10.2941	2.94118
C	1030	Cer	312	29.8077	7.37179	20.5128	1.92308	13.141	7.05128	6.08974	2.88462	45.5128	48.3974	8.65385	0	0	8.65385	0	0	0	0		45.5128	21.7949	25.3205	7.37179
C	1195	CyM&ME	282	36.8794	4.60993	27.305	4.96454	6.73759	4.25532	2.48227	2.12766	43.9716	46.0993	10.2837	0	0	10.2837	0	0	0	0		43.9716	17.0213	34.3972	4.60993
C	1275	CyM&ME	297	28.2828	5.72391	20.202	2.3569	10.7744	5.38721	5.38721	2.6936	50.5051	53.1987	7.74411	0	0	7.74411	0	0	0	0		50.5051	18.5185	25.2525	5.72391
C	1330	CyM&ME	257	47.0817	8.94942	38.1323	0	8.56031	1.55642	7.00389	3.89105	37.7432	41.6342	2.72374	1.16732	0	1.16732	0.389105	0	0	0		39.2996	9.72763	42.0233	8.94942
C	1360	RpC	282	36.5248	6.02837	30.1418	0.35461	7.0922	2.12766	4.96454	0	55.3191	55.3191	1.06383	0.35461	0	0.70922	0	0	0	0		55.6738	7.80142	30.4965	6.02837
C	1375	RpC	309	34.6278	2.91262	29.1262	2.589	6.47249	5.82524	0.647249	44.6602	10.6796	55.3398	3.55987	0	0	3.55987	0	0	0	0		10.6796	10.0324	76.3754	2.91262
C	1385	RpC	263	24.3346	1.90114	22.4335	0	12.9278	7.22433	5.70342	28.8973	33.0798	61.9772	0.760456	0	0	0.760456	0	0	0	0		33.0798	13.6882	51.3308	1.90114
C	1395	RpC	283	14.841	0	14.841	0	9.18728	9.18728	0	21.2014	52.6502	73.8516	2.12014	0	0	2.12014	0	0	0	0		52.6502	11.3074	36.0424	0
C	1410	RpC	362	10.4972	1.10497	8.56354	0.828729	2.20994	2.20994	0	53.3149	32.0442	85.3591	1.9337	0.552486	0	1.38122	0	0	0	0		32.5967	3.59116	62.7072	1.10497
C	1420	RpC	269	25.2788	1.11524	23.0483	1.11524	7.43494	4.08922	3.34572	10.7807	51.3011	62.0818	5.20446	0	0	5.20446	0	0	0	0		51.3011	12.6394	34.9442	1.11524
C	1485	MPE	283	44.8763	12.3675	31.0954	1.41343	1.76678	1.06007	0.706714	20.4947	14.4876	34.9823	18.3746	1.76678	0	16.6078	0	0	0	0		16.2544	18.3746	53.0035	12.3675
C	1495	MPE	223	85.6502	20.1794	55.157	10.3139	5.38117	4.03587	1.34529	0.896861	1.34529	2.24215	5.8296	0	0	5.8296	0	0.896861	0	0		2.24215	11.2108	66.3677	20.1794
C	1510	MPE	335	34.0299	0.597015	33.4328	0	3.8806	2.98507	0.895522	18.209	1.49254	19.7015	40.8955	0.597015	0	38.5075	1.79104	1.49254	0	0		5.37313	42.3881	51.6418	0.597015
C	1550	LPE	294	73.1293	9.18367	50	13.9456	8.5034	3.06122	5.44218	0	14.6259	14.6259	3.7415	0	0	3.7415	0	0	0	0		14.6259	12.2449	63.9456	9.18367
C	1565	LPE	509	43.0255	5.10806	37.9175	0	8.44794	3.73281	4.71513	5.89391	33.3988	39.2927	2.94695	1.17878	0	1.76817	0	6.28684	0	0		40.8644	10.2161	43.8114	5.10806
C	1575	LPE	326	93.5583	0	93.5583	0	0	0	0	6.44172	0	6.44172	0	0	0	0	0	0	0	0		0	0	100	0
C	1580	LPE	261	96.9349	1.14943	95.7854	0	0	0	0	3.06513	0	3.06513	0	0	0	0	0	0	0	0		0	0	98.8506	1.14943
C	1585	LPE	234	95.2991	2.13675	93.1624	0	0	0	0	4.70085	0	4.70085	0	0	0	0	0	0	0	0		0	0	97.8632	2.13675
C	1590	LPE	310	85.1613	7.41935	75.1613	2.58065	0.322581	0.322581	0	12.9032	1.6129	14.5161	0	0	0	0	0	0	0	0		1.6129	0.322581	90.6452	7.41935
C	1600	LPE	322	95.6522	1.86335	90.0621	3.72671	1.24224	0	1.24224	3.10559	0	3.10559	0	0	0	0	0	0	0	0		0	1.24224	96.8944	1.86335
C	1610	LPE	371	100	12.4	87.6	0	0	0	0	0	0	0	0	0	0	0	0	0	0	0		0	0	87.6	12.4
